# Supplementary material for: Reduced levels of circulating adhesion molecules in adolescents with early-onset psychosis
Source: PubMed Central journal article supplement (PMC7434772; doi:10.1038/s41537-020-00112-5), 2020-08-18
Supplement: 41537_2020_112_MOESM1_ESM.pdf [file 41537_2020_112_MOESM1_ESM.pdf]

**Supplementary Table 1.** Spearman's bivariate correlation analyses between plasma levels of adhesion molecules and the corresponding mRNA expression level in PBMCs in the full sample and subsamples (patients and HC)

|          | <i>PSEL</i> mRNA with sP-selectin |          | <i>JAMA</i> mRNA with sJAM-A |          | <i>ICAM</i> mRNA with sICAM-1 |          | <i>NCAD</i> mRNA with sN-CAD |          |
|----------|-----------------------------------|----------|------------------------------|----------|-------------------------------|----------|------------------------------|----------|
|          | <i>r</i>                          | <i>p</i> | <i>r</i>                     | <i>p</i> | <i>r</i>                      | <i>p</i> | <i>r</i>                     | <i>p</i> |
| All      | 0.12                              | 0.326    | -0.06                        | 0.625    | 0.20                          | 0.093    | 0.05                         | 0.696    |
| HC       | 0.20                              | 0.184    | -0.08                        | 0.616    | 0.18                          | 0.230    | 0.04                         | 0.775    |
| Patients | 0.37                              | 0.066    | -0.02                        | 0.910    | 0.20                          | 0.328    | 0.03                         | 0.871    |

Key: *PSEL* platelet selectin, sP-selectin soluble platelet selectin, *JAMA* junctional adhesion molecule-A, sJAM-A soluble junctional adhesion molecule-A, *ICAM* intercellular adhesion molecule-1, sICAM-1 soluble intercellular adhesion molecule-1, *NCAD* neuronal cadherin, sN-CAD soluble neuronal cadherin, *mRNA* messenger ribonucleic acid, *r* Spearman's rank correlation coefficient, *p* p-value

**Supplementary Table 2.** Spearman's bivariate correlation analyses of sP-selectin, sVCAM-1 and *PSEL* mRNA with markers of disease severity (patients only)

|                      | sP-selectin |          | sVCAM-1  |          | <i>PSEL</i> mRNA |              |
|----------------------|-------------|----------|----------|----------|------------------|--------------|
|                      | <i>r</i>    | <i>p</i> | <i>r</i> | <i>p</i> | <i>r</i>         | <i>p</i>     |
| PANSS positive score | 0.10        | 0.546    | -0.03    | 0.860    | -0.22            | 0.301        |
| PANSS negative score | -0.06       | 0.719    | -0.12    | 0.495    | -0.35            | 0.100        |
| PANSS general score  | 0.18        | 0.305    | -0.21    | 0.221    | -0.12            | 0.607        |
| CGAS                 | -0.08       | 0.615    | 0.28     | 0.094    | -0.07            | 0.735        |
| DUP                  | 0.10        | 0.545    | -0.07    | 0.681    | -0.36            | 0.079        |
| Duration of illness  | -0.29       | 0.079    | 0.09     | 0.592    | <b>-0.64</b>     | <b>0.001</b> |
| CPZ years            | -0.22       | 0.186    | -0.18    | 0.290    | -0.33            | 0.107        |

Key: *sP-selectin* soluble platelet selectin, *sVCAM-1* soluble vascular adhesion molecule-1, *PSEL* mRNA platelet selectin messenger ribonucleic acid, *PANSS* positive and negative syndrome scale, *CGAS* children's global assessment scale, *DUP* duration of untreated psychosis, *CPZ* years lifetime exposure to antipsychotic medication in chlorpromazine equivalents, *r* Spearman's rank correlation coefficient, *p* p-value. Significant result in bold, also after correction for multipel testing (Bonferroni), (0.05/21 tests=0.002).

**Supplementary Table 3.** Phenotypical characteristics of contrasting patient groups identified by dichotomizing levels of sP-selectin and *PSEL* mRNA

|                           | Low sPselectin-low mRNA<br>n=9 | High Pselectin-high mRNA<br>n=8 | <i>p</i> -value* |
|---------------------------|--------------------------------|---------------------------------|------------------|
| Male sex n (%)            | 4 (44)                         | 1 (13)                          | 0.149            |
| Age                       | 16.5 (1.6)                     | 16.1 (1.4)                      | 0.635            |
| Diagnosis                 |                                |                                 | 0.351            |
| SCZ spectrum              | 6                              | 3                               |                  |
| Affective psychosis       | 0                              | 1                               |                  |
| Other psychotic disorders | 3                              | 4                               |                  |

|                                              |                 |                |       |
|----------------------------------------------|-----------------|----------------|-------|
| Currently medicated n (%)                    | 4 (44)          | 5 (63)         | 0.457 |
| CPZ years, median (min, max)                 | 4.3 (0.0, 59.3) | 3.0 (0.0, 6.7) | 0.673 |
| DUP weeks, median (min, max)                 | 50 (1,60)       | 10 (2,227)     | 0.277 |
| Duration of illness years, median (min, max) | 1.8 (1.1, 6.35) | 0.8 (0.5, 4.5) | 0.011 |
| PANSS positive score                         | 17.2 (4.1)      | 16.1 (4.8)     | 0.620 |
| PANSS negative score                         | 19.8 (6.5)      | 15.8 (6.0)     | 0.221 |
| CGAS                                         | 42.1 (8.0)      | 41.4 (7.2)     | 0.846 |
| BMI                                          | 21.4 (5.5)      | 24.9 (4.3)     | 0.165 |
| Smoking daily n (%)                          | 3 (33.3)        | 1 (12.5)       | 0.312 |
| Trombocyte count                             | 249.9 (50.9)    | 302.9 (31.5)   | 0.025 |
| Leukocyte count                              | 5.2 (1.1)       | 6.1 (1.4)      | 0.172 |
| Ferritin                                     | 54.3 (48.6)     | 63.4 (68.6)    | 0.792 |
| CRP                                          | 0.87 (0.47)     | 2.55 (4.47)    | 0.323 |

*Key:* SCZ schizophrenia, CPZ years lifetime exposure to antipsychotic medication in chlorpromazine equivalents, DUP duration of untreated psychosis, PANSS positive and negative syndrome scale, CGAS children's global assessment scale, BMI body mass index, CRP C-reactive protein, \*p-value from t-test, Mann-U-Whitney or Chi-square, as appropriate
